# Supplementary material
Source: Royal Society of Chemistry journal article supplement (doi:10.1039/d6ce00155f)
Supplement: d6ce00155f1.pdf [file d6ce00155f1.pdf]

Supporting information

**Diverting metal site in flavin-copper complexes for nanoparticle  
synthesis**

*Dipayan Mondal, Ashutosh Kumar Mishra\**

*Department of Chemistry, Indian Institute of Technology-Hyderabad, Kandi-502285, India.*

*E-mail: [akm@chy.iith.ac.in](mailto:akm@chy.iith.ac.in)*

**Table of contents**

|                                                                                       |    |
|---------------------------------------------------------------------------------------|----|
| 1. Synthetic procedure and characterization of <b>C7-Flc</b> and <b>N10-Flc</b> ..... | 2  |
| 2. Structural refinement parameters of crystals.....                                  | 4  |
| 3. Crystal description of complexes.....                                              | 5  |
| 4. UV-Vis, Emission, PXRD and FT-IR data of complexes.....                            | 11 |
| 5. Lattice parameters of <b>CuNP1</b> and <b>CuNP2</b> .....                          | 16 |
| 6. EDX imaging of copper nanoparticles.....                                           | 17 |
| 7. CheckCIF reports for complexes.....                                                | 19 |
| 8. NMR and HRMS data.....                                                             | 29 |
| 9. References.....                                                                    | 36 |

## Synthetic procedure of C7-Flc

As shown in Scheme S1, the reaction begins with the esterification of 4-chloro-3-nitrobenzoic acid **1** to yield the corresponding ester **2**. Further, nucleophilic aromatic substitution reaction was performed between **2** and n-propylamine in the presence of NaOAc to get **3**. Further, reduction of compound **3** in the presence of NaBH<sub>4</sub> yielded an amino derivative, followed by a condensation reaction with alloxan monohydrate to obtain flavin derivative **4**. Furthermore, protection of **4** was done using methyl iodide and K<sub>2</sub>CO<sub>3</sub> to get the corresponding protected flavin **5**. Finally, the deprotection step was carried out to achieve the final compound **C7-Flc** with excellent yield. M.P = 307-310 °C<sup>1,2</sup>

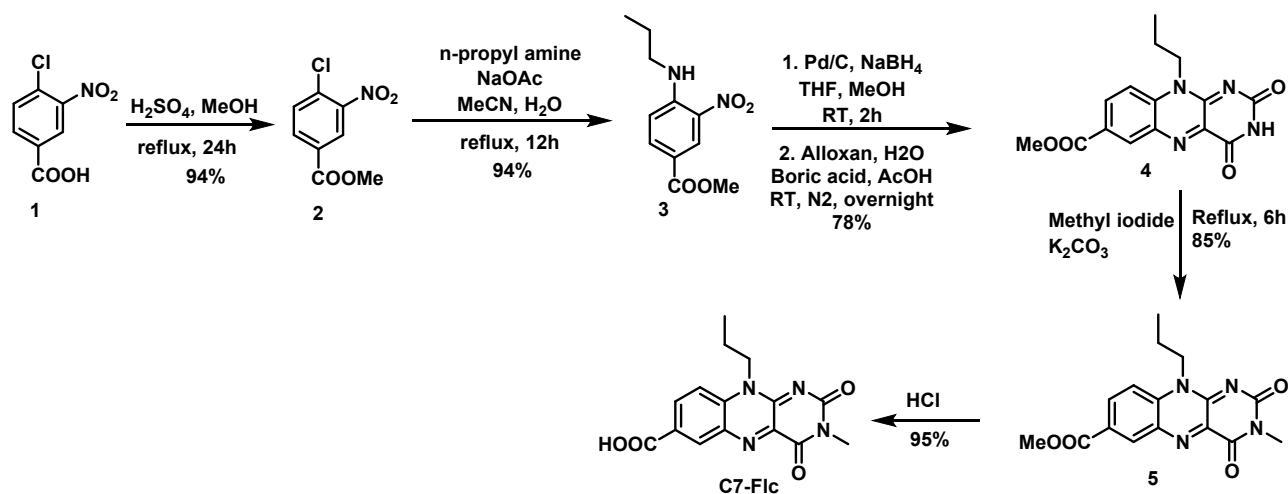

**Scheme S1.** Schematic representation of the synthesis of **C7-Flc**.<sup>1,2</sup>

## Synthetic procedure and characterization of N10-Flc

As shown in Scheme S2, the esterification of the carboxyl group of **8** was done by using methanol and  $\text{SOCl}_2$  to get the corresponding ester derivative **9**. Further, nucleophilic aromatic substitution reaction of **9** with fluoro-nitrobenzene gave nitro derivative **10**. Later, reduction of **10** was achieved into the monofunctionalized diaminobenzene derivative **11**, via using  $\text{H}_2/\text{Pd/C}$ . Further, condensation reaction of **11** was proceeded with alloxan monohydrate in the presence of boric acid in acetic acid/methanol solution to obtain the isoalloxazine ester derivative **12**.<sup>3</sup>

The detailed synthesis of **13** and N10-Flc was given in below, are described in one submitted work (in revision). Standard characterization techniques were utilized to characterize the **13** and N10-Flc.<sup>4</sup>

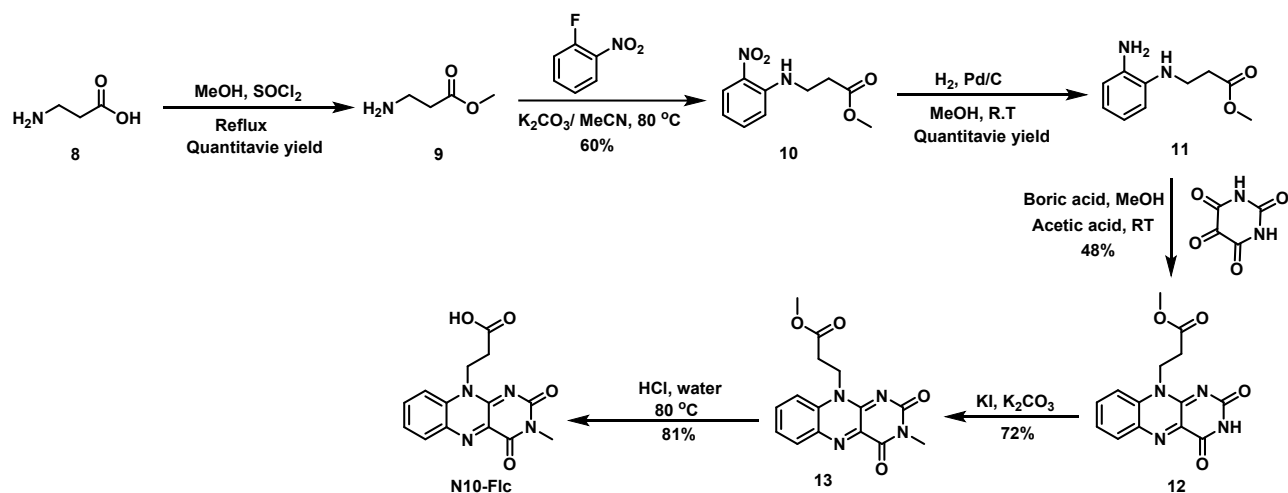

**Scheme S2.** Schematic representation of the synthesis of N10-Flc.<sup>3,4</sup>

### Synthesis of methyl 3-(3-methyl-2,4-dioxo-3,4-dihydrobenzo[g]pteridin-10(2H)-yl)propanoate (**13**)

6.67 mmol of **12** was dissolved in DMF (40 mL) followed by addition of potassium carbonate (26.68 mmol) and methyl iodide (333.03 mmol). The reaction mixture was subjected to reflux condition for 6hrs. After completion of the reaction, yellow solid was obtained via washing the reaction mixture

with water. Further, dried yellow solid was subjected to silica gel column chromatography using chloroform and methanol to give pure **13** with a yield of 72%.

$^1\text{H}$  NMR (400 MHz,  $\text{CDCl}_3$ )  $\delta$  8.35 (dd,  $J = 8.2, 1.4$  Hz, 1H), 7.96-7.91 (m, 1H), 7.79 (d,  $J = 8.2$  Hz, 1H), 7.65 (ddd,  $J = 8.2, 7.2, 1.0$  Hz, 1H), 5.00 (t,  $J = 8$  Hz, 2H), 3.72 (s, 3H), 3.53 (s, 3H), 2.96 (t,  $J = 7.6$  Hz, 2H).  $^{13}\text{C}$  NMR (101 MHz,  $\text{CDCl}_3$ )  $\delta$  170.76, 159.62, 155.72, 148.74, 136.86, 136.01, 135.93, 133.63, 132.30, 126.71, 115.01, 52.34, 40.72, 31.07, 28.87. HRMS (ESI)  $m/z = [\text{C}_{15}\text{H}_{14}\text{N}_4\text{O}_4 + \text{H}_2\text{O}]^+$  Calculated for **13**: 332.1121, Found: 332.1133.

### Synthesis of **N10-F1c**

Further the deprotection of ester of compound **13** (400 mg), was done by adding conc hydrochloric acid (1.5 ml), followed by addition of distilled water (3 ml). Further heating was applied upto 80°C. After 15-20 minutes, yellow precipitate start to observe. The reaction was continued till 2 hrs to get the better precipitate. Later, the precipitate was washed and subjected to column chromatography to get the final pure product, **N10-F1c** (yield = 81%).

M.P = 310-316 °C  $^1\text{H}$  NMR (400 MHz, DMSO)  $\delta$  12.66 (s, 1H), 8.16 (dd,  $J = 8.1, 1.4$  Hz, 1H), 8.08 (d,  $J = 8.5$  Hz, 1H), 7.98-7.94 (m, 1H), 7.68 – 7.64 (m, 1H), 4.79 (t,  $J = 8$  Hz, 2H), 3.27 (s, 3H), 2.74 (t,  $J = 8$  Hz, 2H).  $^{13}\text{C}$  NMR (101 MHz, DMSO)  $\delta$  172.33, 159.91, 155.62, 149.35, 138.10, 135.64, 135.51, 132.70, 132.31, 126.59, 116.78, 31.07, 28.48. HRMS (ESI)  $m/z = [\text{C}_{14}\text{H}_{12}\text{N}_4\text{O}_4 + \text{K}]^+$  Calculated for **N10-F1c**: 339.0496, Found: 339.0489.

Table S1. Crystal Structure Refinement parameter for **C7F1cCu** and **N10F1cCu**.

| Identification code                             | <b>C7F1cCu</b>                                                   | <b>N10F1cCu</b>                                                    |
|-------------------------------------------------|------------------------------------------------------------------|--------------------------------------------------------------------|
| <b>empirical formula</b>                        | C <sub>34</sub> H <sub>40</sub> CuN <sub>8</sub> O <sub>12</sub> | C <sub>14</sub> H <sub>13</sub> Cu0.5N <sub>4</sub> O <sub>4</sub> |
| <b>formula weight</b>                           | 816.29                                                           | 698.12                                                             |
| <b>crystal colour</b>                           | orange                                                           | orange                                                             |
| <b>crystal system</b>                           | triclinic                                                        | monoclinic                                                         |
| <b>space group</b>                              | <i>P</i> 1                                                       | C2/c                                                               |
| <b>a/Å</b>                                      | 8.423                                                            | 33.820                                                             |
| <b>b/Å</b>                                      | 9.815                                                            | 10.7349                                                            |
| <b>c/Å</b>                                      | 11.557                                                           | 8.6029                                                             |
| <b>α/deg</b>                                    | 101.688                                                          | 90                                                                 |
| <b>β/deg</b>                                    | 101.380                                                          | 91.611                                                             |
| <b>γ/deg</b>                                    | 92.361                                                           | 90                                                                 |
| <b>volume/Å<sup>3</sup></b>                     | 914.0(3)                                                         | 3122.1                                                             |
| <b>D<sub>calcd</sub> (g/cm<sup>3</sup>)</b>     | 1.483                                                            | 1.485                                                              |
| <b>temp/K</b>                                   | 298                                                              | 298                                                                |
| <b>Z</b>                                        | 1                                                                | 8                                                                  |
| <b>μ (mm<sup>-1</sup>)</b>                      | 0.672                                                            | 0.769                                                              |
| <b>F(000)</b>                                   | 425.0                                                            | 1436.0                                                             |
| <b>Reflections observed</b>                     | 3839                                                             | 3066                                                               |
| <b>R(int)</b>                                   | 10.90                                                            | 9.68                                                               |
| <b>final R<sub>1</sub> values (all data)</b>    | 0.0605 (2200)                                                    | 0.0688 (2136)                                                      |
| <b>final wR(F<sup>2</sup>) values(all data)</b> | 0.1516 (3839)                                                    | 0.1907(3066)                                                       |
| <b>GOF on F<sup>2</sup></b>                     | 1.036                                                            | 1.027                                                              |

## Crystal description of copper complexes in the crystal lattice

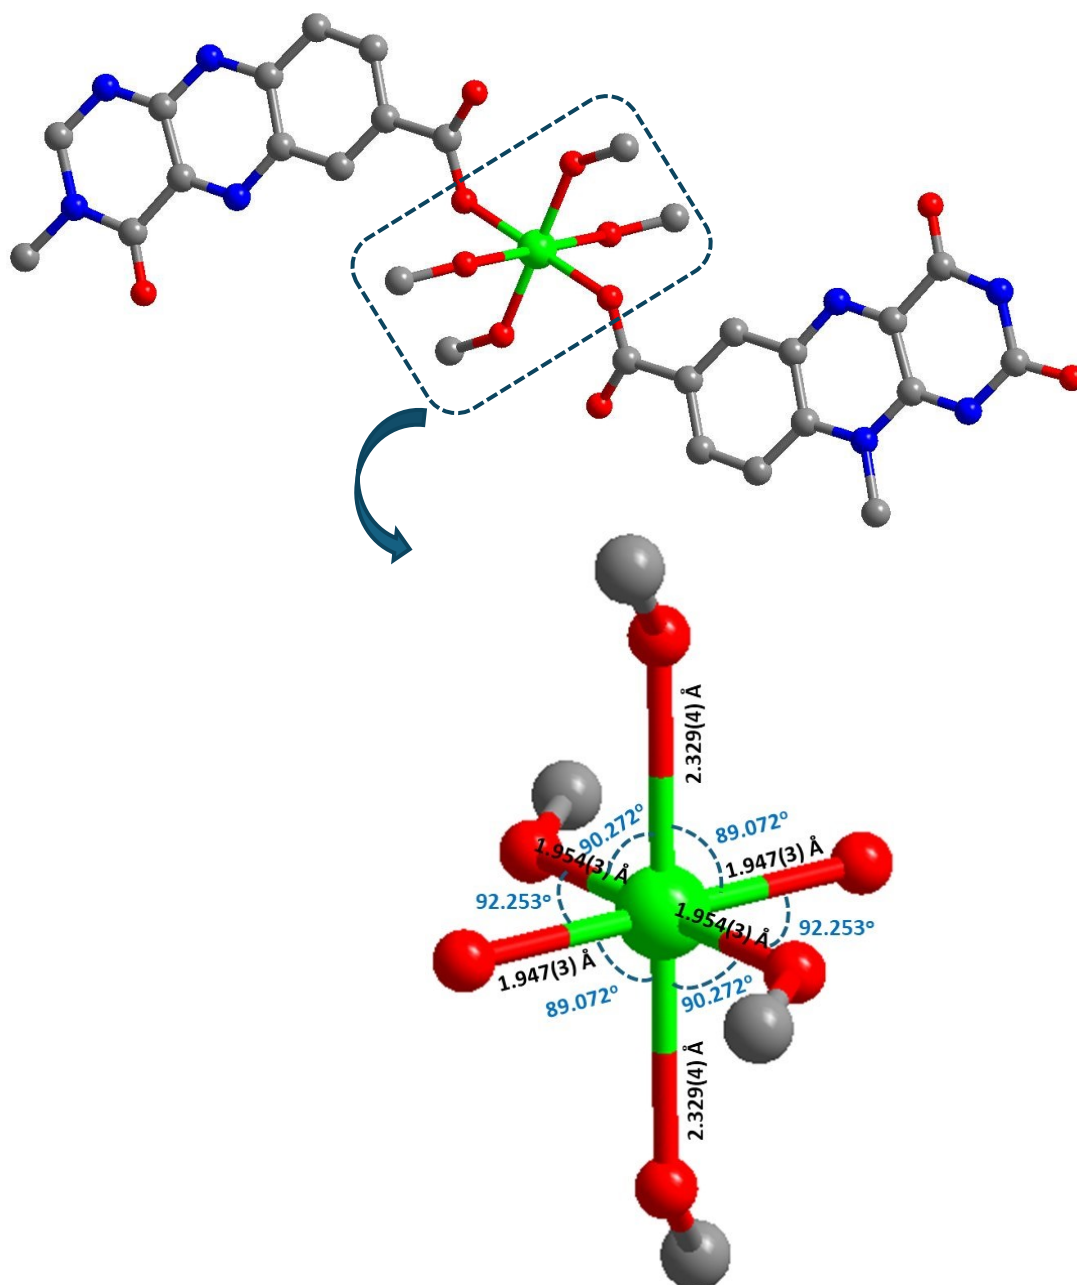

**Figure S1.** Representation of bond length, bond angles at the coordination site of C7F1cCu. (hydrogen atoms are omitted due to clarity)

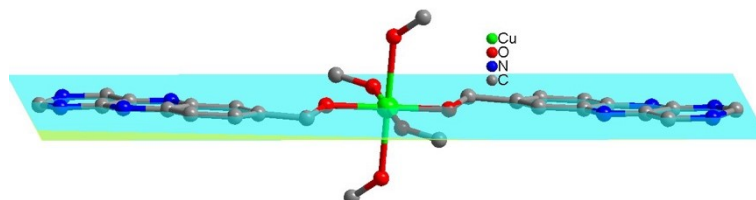

**Figure S2.** Pictorial representation of the planes passing through the two flavin moieties involved in **C7FicCu** complex formation. (Hydrogen atoms are omitted due to clarity)

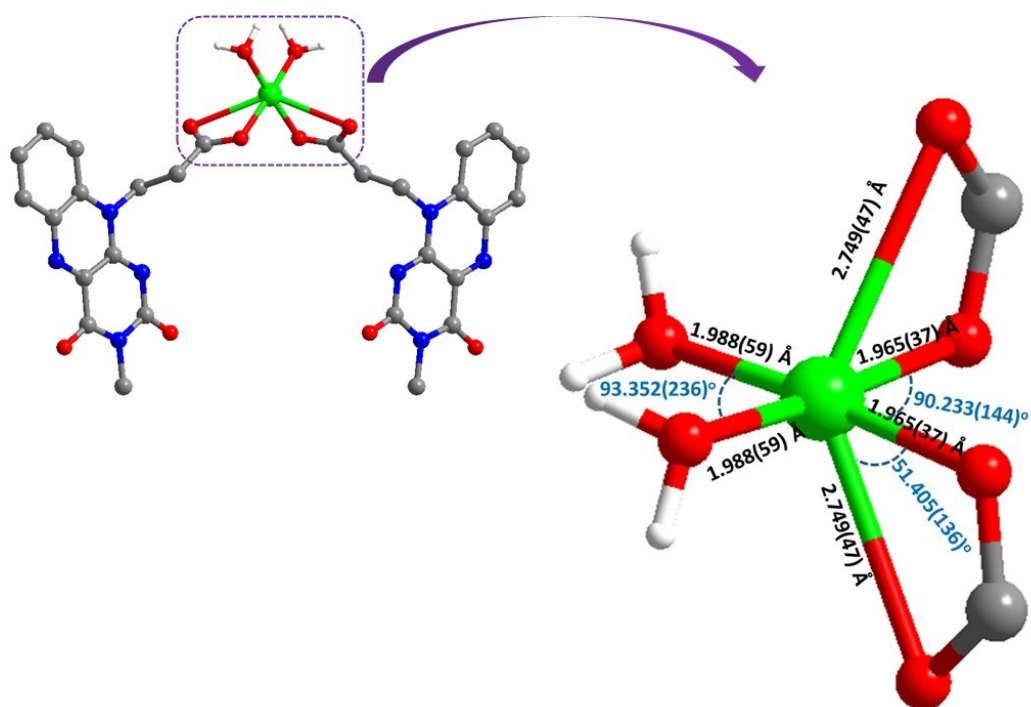

**Figure S3.** Representation of bond length and bond angle at the coordination site of **N10FicCu**. (Few hydrogen atoms are omitted due to clarity)

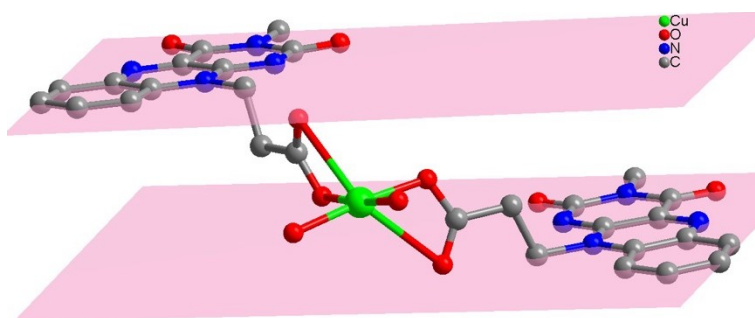

**Figure S4.** Pictorial representation of the planes passing through the two flavin moieties involved in **N10FlcCu** complex formation. (Hydrogen atoms are omitted due to clarity)

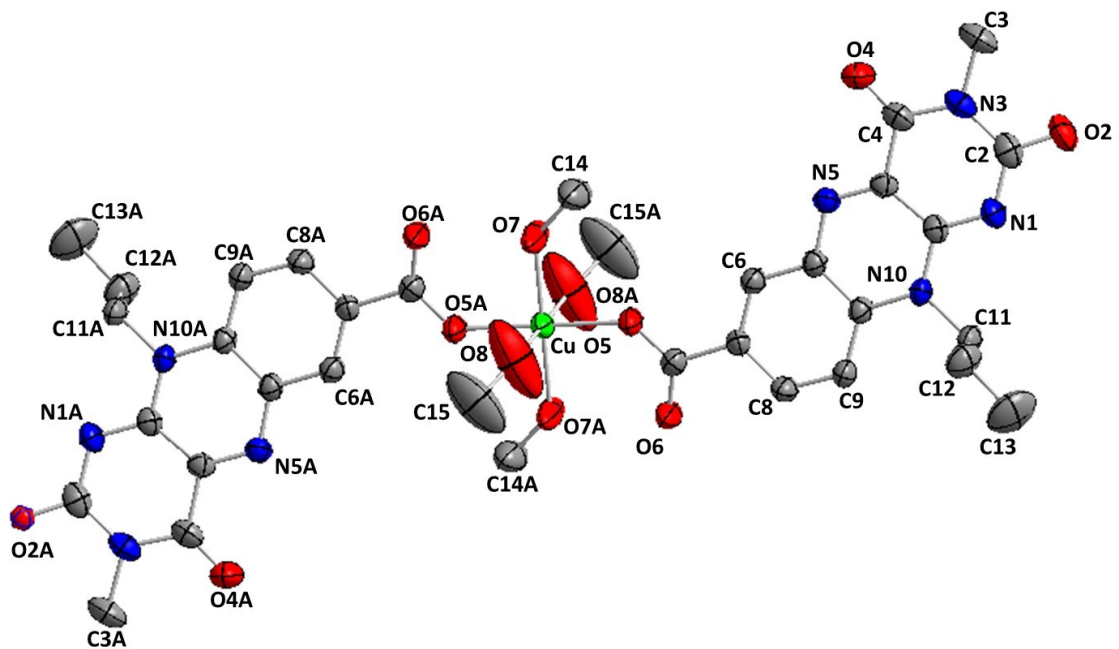

Figure S5. ORTEP diagram of **C7F1cCu**. (Hydrogen atoms are omitted due to clarity)

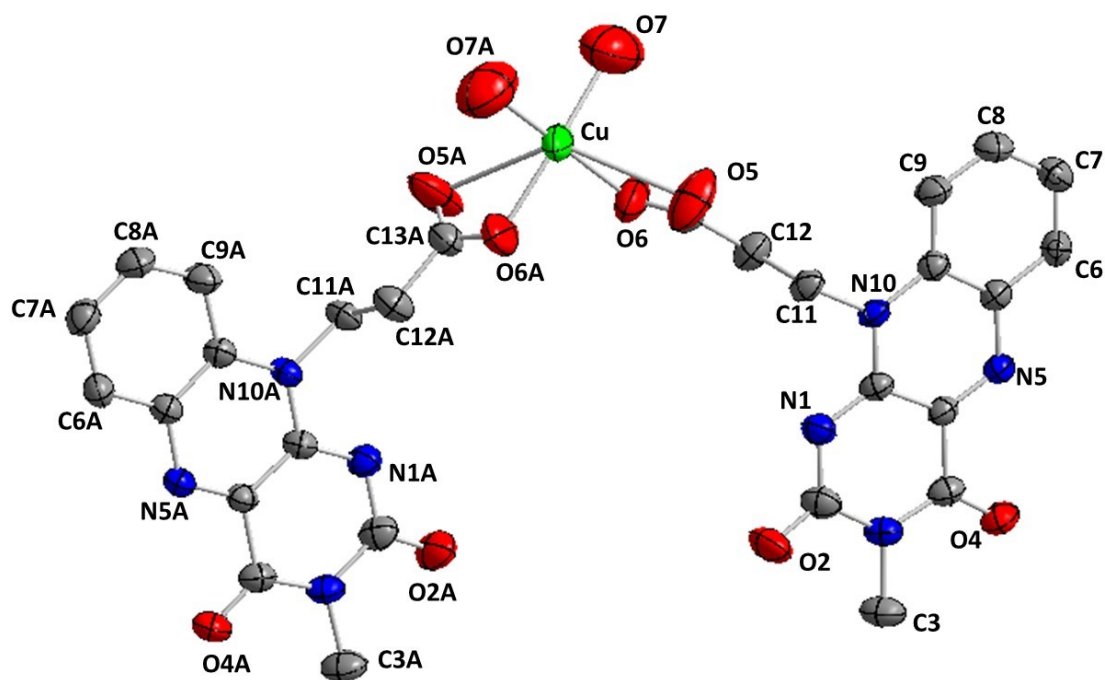

Figure S6. ORTEP diagram of N10FlcCu. (Hydrogen atoms are omitted due to clarity)

## UV-Vis and fluorescence data of copper complexes formation

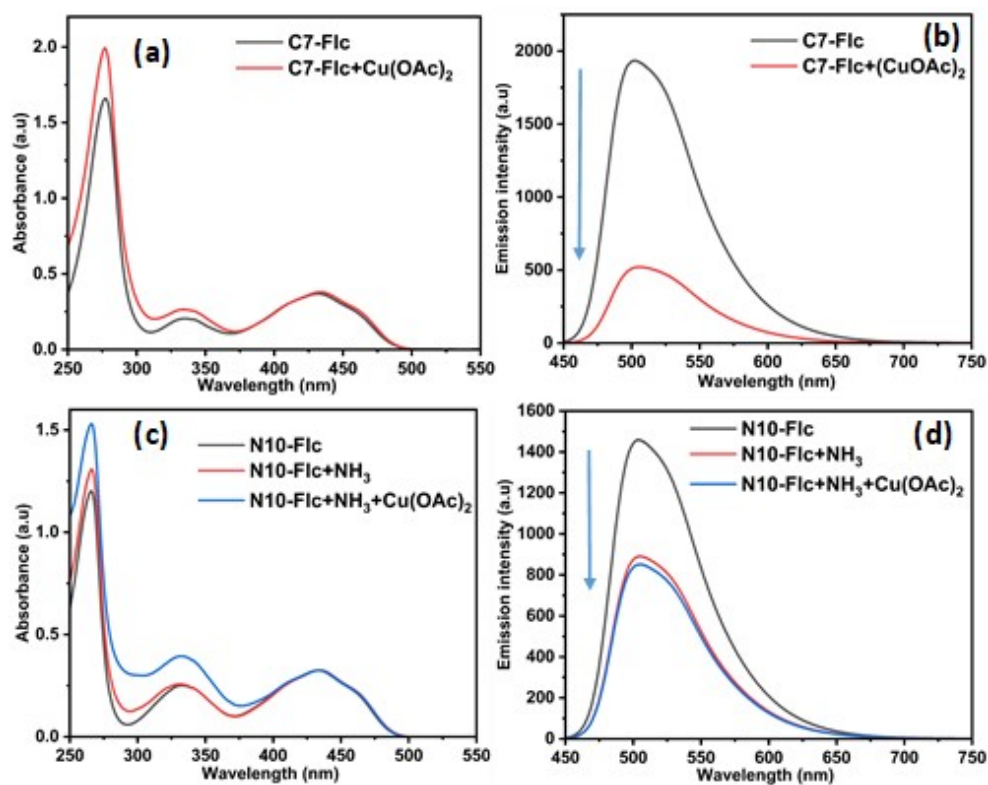

**Figure S7.** Illustration of the (a) absorption and (b) emission spectra of the C7-Flc with the addition of the Cu(OAc)<sub>2</sub>; (c) absorption and (d) emission spectra of the N10-Flc with the addition of the Cu(OAc)<sub>2</sub> in presence of methanolic ammonia.

**PXRD pattern of experimental and simulated data of copper complexes**

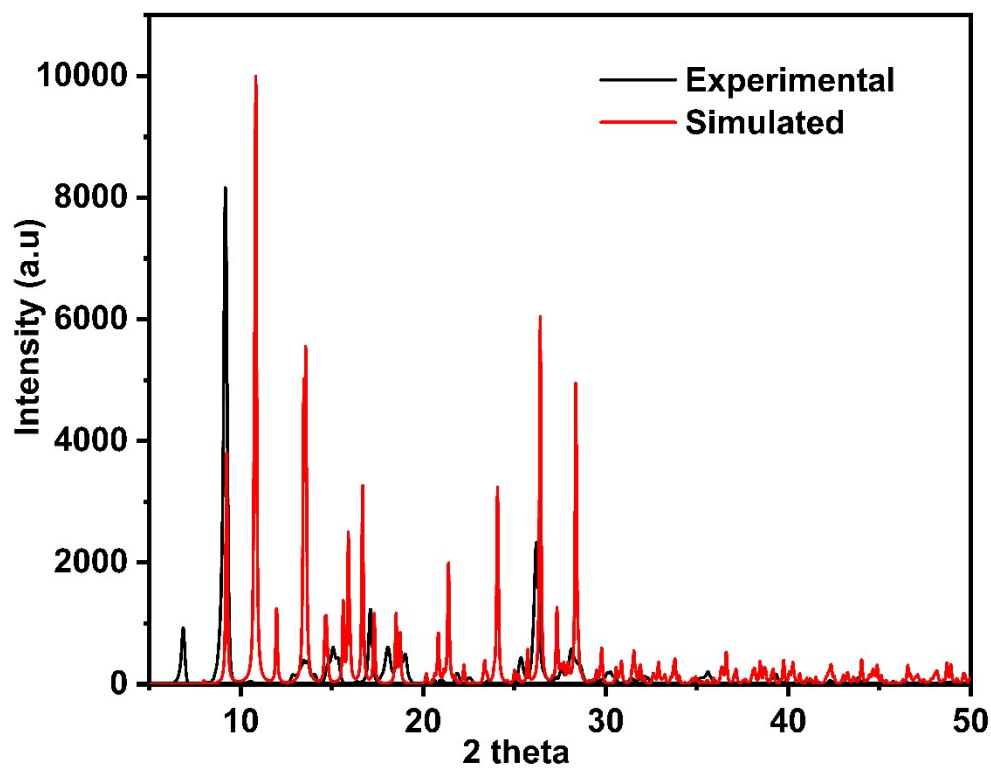

**Figure S8.** Experimental and simulated PXRD of C7F1cCu.

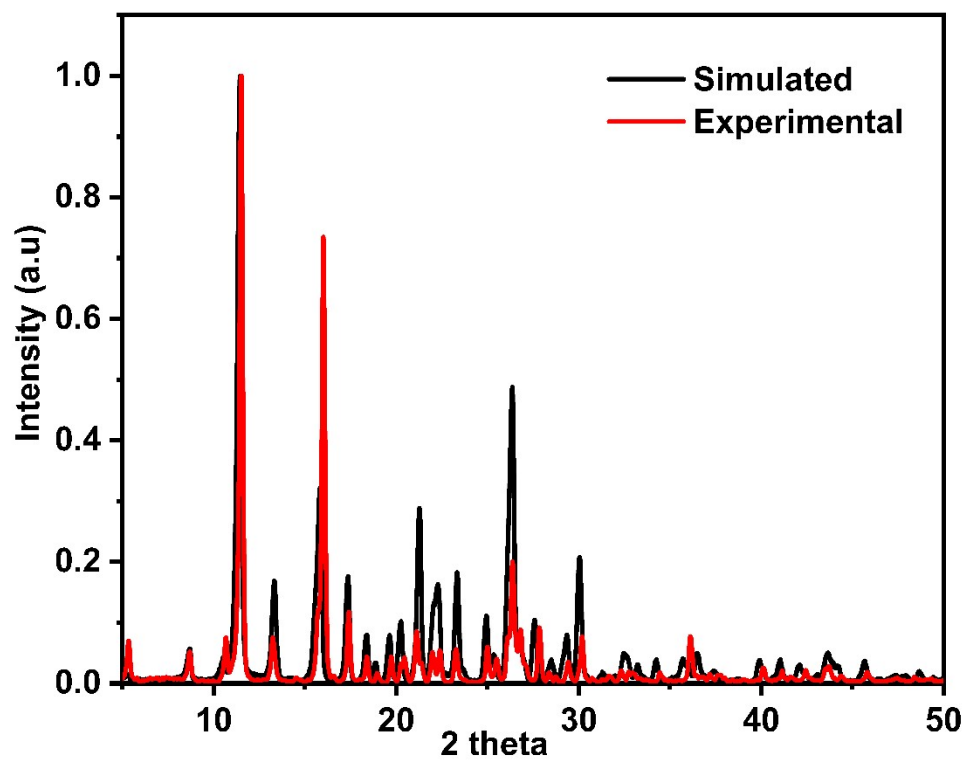

Figure S9. Experimental and simulated PXRD of N10FlcCu.

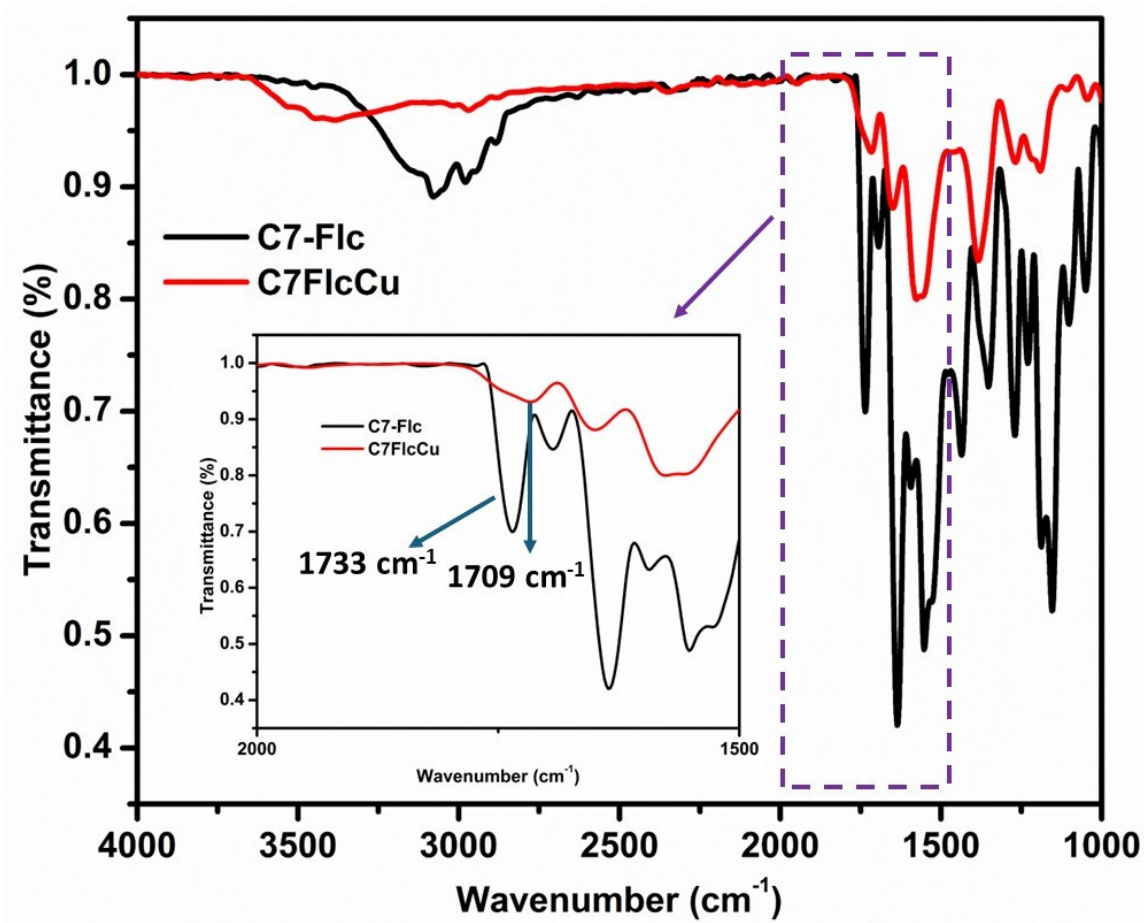

Figure S10. FT-IR of C7-Flc and C7FlcCu.

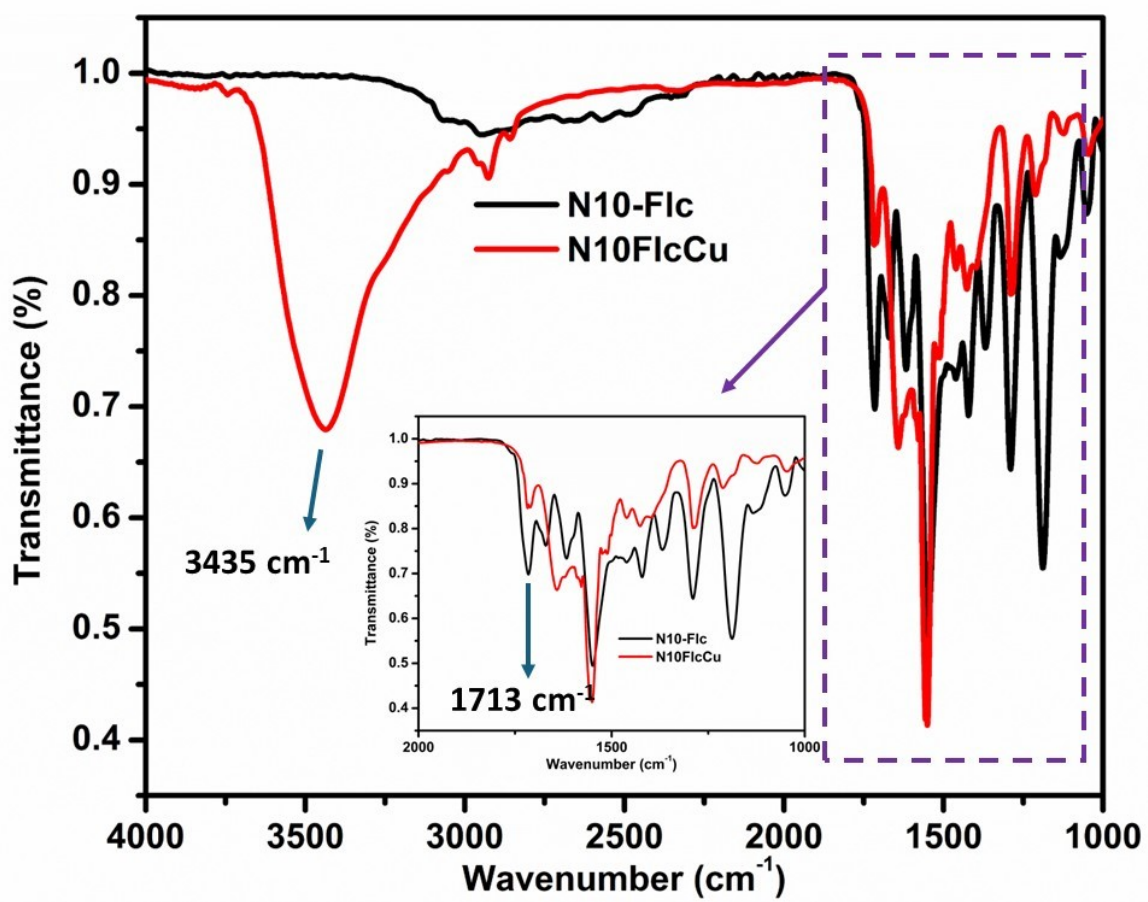

Figure S11. FT-IR of N10-Flc and N10FlcCu.

**Table S2.** Lattice Parameters of the prepared Cuprous oxide Nanoparticles.

| <b>Nanoparticles</b> | <b>2<math>\theta</math> of<br/>intense<br/>peak<br/>(<math>^{\circ}</math>)</b> | <b><math>\beta</math><br/>(radian)</b> | <b>cos<math>\theta</math><br/>(radian)</b> | <b>crystallite<br/>diameter<br/>D (nm)</b> | <b>Avg<br/>crystallite<br/>diameter<br/>D (nm)</b> |
|----------------------|---------------------------------------------------------------------------------|----------------------------------------|--------------------------------------------|--------------------------------------------|----------------------------------------------------|
| <b>CuNP1</b>         | 36.61                                                                           | 0.118665                               | 0.855357                                   | 1.426194                                   | 2.002923                                           |
|                      | 42.55                                                                           | 0.069202                               | 0.75434                                    | 2.77307                                    |                                                    |
|                      | 61.61                                                                           | 0.097791                               | 0.819117                                   | 1.807194                                   |                                                    |
|                      | 73.77                                                                           | 0.105156                               | 0.686514                                   | 2.005231                                   |                                                    |
| <b>CuNP2</b>         | 36.68                                                                           | 0.061942                               | 0.872961                                   | 2.486207                                   | 2.450915                                           |
|                      | 42.53                                                                           | 0.055135                               | 0.74774                                    | 2.793147                                   |                                                    |
|                      | 61.48                                                                           | 0.079639                               | 0.780128                                   | 1.933717                                   |                                                    |
|                      | 73.87                                                                           | 0.059446                               | 0.721997                                   | 2.59059                                    |                                                    |

## EDX imaging of copper nanoparticles

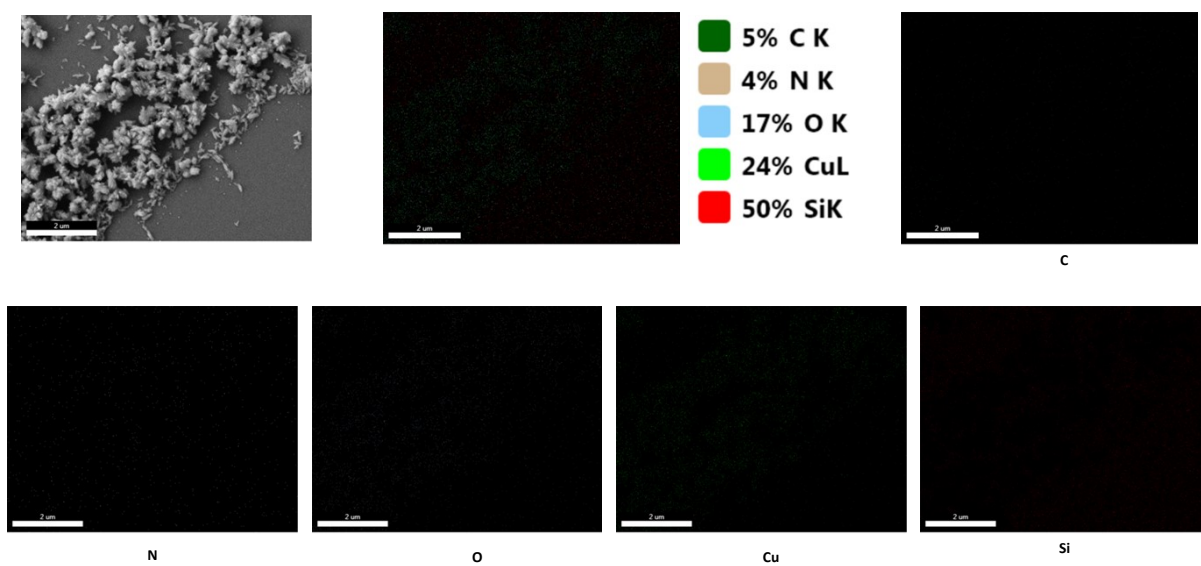

Figure S12. EDX mapping of CuNP1.

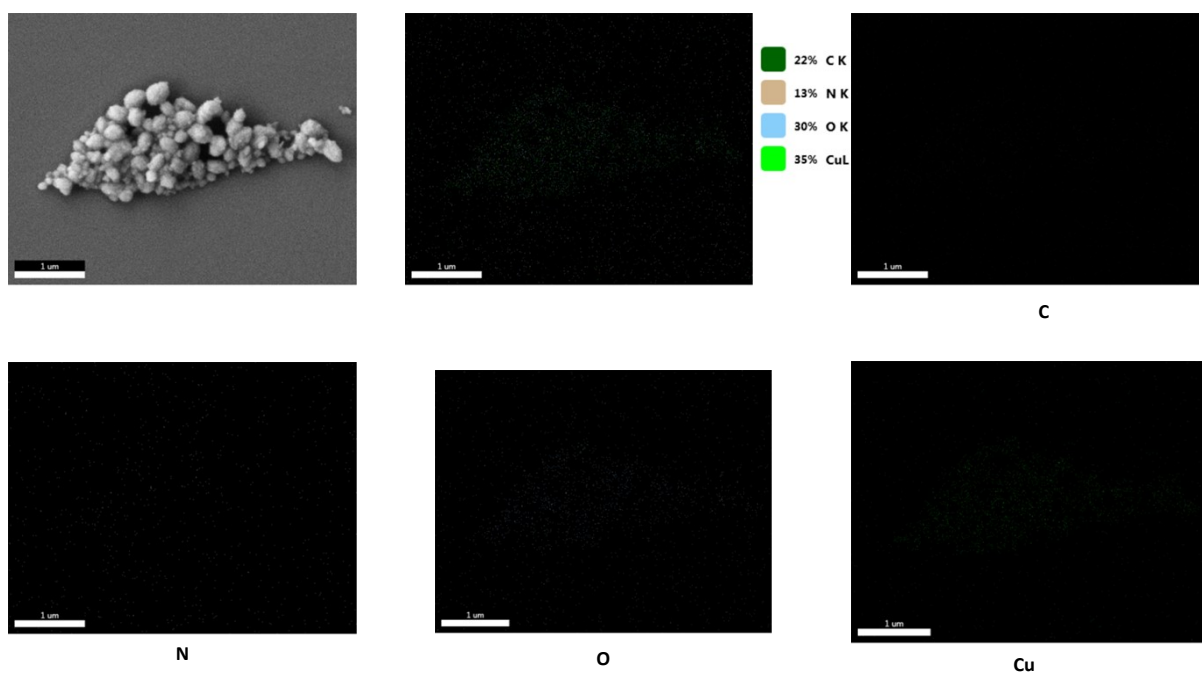

**Figure S13.** EDX mapping of CuNP2.

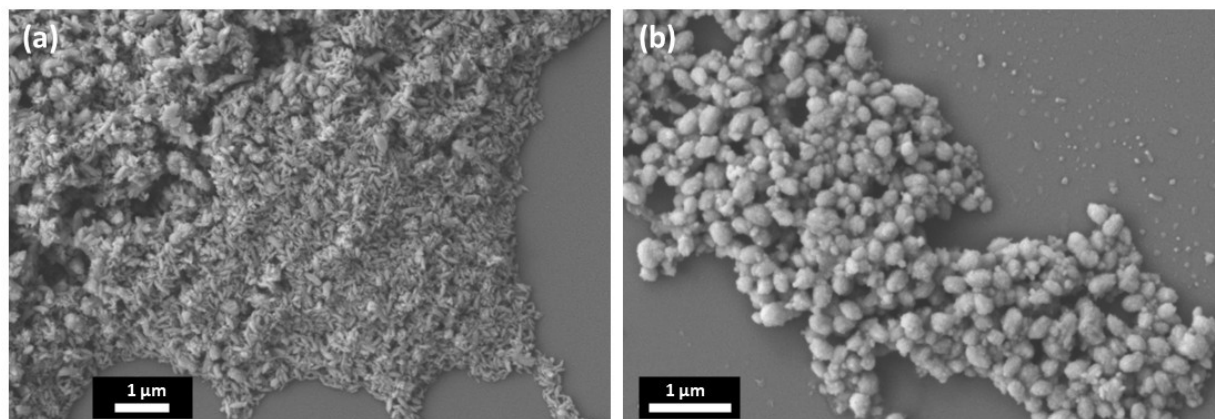

**Figure S14.** FE-SEM image of (a) CuNP1 and (b) CuNP2 at higher magnification (1 μm).

## Checkcif report of C7FlcCu

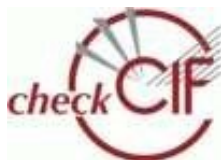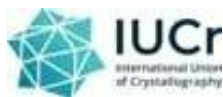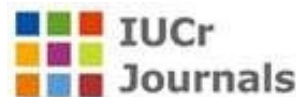

### checkCIF/PLATON report

Structure factors have been supplied for datablock(s) c7flccu

THIS REPORT IS FOR GUIDANCE ONLY. IF USED AS PART OF A REVIEW PROCEDURE FOR PUBLICATION, IT SHOULD NOT REPLACE THE EXPERTISE OF AN EXPERIENCED CRYSTALLOGRAPHIC REFEREE.

No syntax errors found.      CIF dictionary      Interpreting this report

### Datablock: c7flccu

---

|                        |                   |                    |                  |
|------------------------|-------------------|--------------------|------------------|
| Bond precision:        | C-C = 0.0055 Å    | Wavelength=0.71073 |                  |
| Cell:                  | a=8.423 (2)       | b=9.815 (2)        | c=11.557 (2)     |
|                        | alpha=101.688 (7) | beta=101.380 (7)   | gamma=92.361 (8) |
| Temperature:           | 298 K             |                    |                  |
|                        | Calculated        | Reported           |                  |
| Volume                 | 914.0 (3)         | 914.0 (3)          |                  |
| Space group            | P -1              | P -1               |                  |
| Hall group             | -P 1              | -P 1               |                  |
| Moiety formula         | C34 H40 Cu N8 O12 | C34 H40 Cu N8 O12  |                  |
| Sum formula            | C34 H40 Cu N8 O12 | C34 H40 Cu N8 O12  |                  |
| Mr                     | 816.29            | 816.28             |                  |
| Dx, g cm <sup>-3</sup> | 1.483             | 1.483              |                  |
| Z                      | 1                 | 1                  |                  |
| Mu (mm <sup>-1</sup> ) | 0.672             | 0.672              |                  |
| F000                   | 425.0             | 425.0              |                  |
| F000'                  | 425.52            |                    |                  |
| h, k, lmax             | 10, 12, 14        | 10, 12, 14         |                  |
| Nref                   | 4057              | 3839               |                  |
| Tmin, Tmax             | 0.953, 0.967      | 0.595, 0.746       |                  |
| Tmin'                  | 0.941             |                    |                  |

Correction method= # Reported T Limits: Tmin=0.595 Tmax=0.746 AbsCorr = MULTI-SCAN

Data completeness= 0.946

Theta(max)= 27.134

R(reflections)= 0.0605( 2200)

wR2(reflections)=

0.1516( 3839)

S = 1.036

Npar= 258

---

The following ALERTS were generated. Each ALERT has the format  
**test-name\_ALERT\_alert-type\_alert-level.**

Click on the hyperlinks for more details of the test.

---

 **Alert level B**

PLAT242\_ALERT\_2\_B Low MainResAtom Ueq as Compared to Neighbours Cul Check  
PLAT430\_ALERT\_2\_B Short Inter D...A Contact O2 ..07 . 2.71 Ang.  
1+x,1+y,1+z = 1\_666 Check

---

 **Alert level C**

ABSTY02\_ALERT\_1\_C An \_exptl\_absorpt\_correction\_type has been given without  
a literature citation. This should be contained in the  
\_exptl\_absorpt\_process\_details field.  
Absorption correction given as multi-scan

PLAT029\_ALERT\_3\_C \_diffn\_measured\_fraction\_theta\_full value Low . 0.972 Why?  
PLAT220\_ALERT\_2\_C NonSolvent Resd 1 C Ueq(max)/Ueq(min) Range 4.7 Ratio  
PLAT220\_ALERT\_2\_C NonSolvent Resd 1 O Ueq(max)/Ueq(min) Range 3.2 Ratio  
PLAT222\_ALERT\_3\_C NonSolvent Resd 1 H Uiso(max)/Uiso(min) Range 5.2 Ratio  
PLAT241\_ALERT\_2\_C High MainResAtom Ueq as Compared to Neighbours 07 Check  
PLAT241\_ALERT\_2\_C High MainResAtom Ueq as Compared to Neighbours 08 Check  
PLAT245\_ALERT\_2\_C U(iso) H8 Smaller than U(eq) O8 by 0.031 Ang\*\*2  
PLAT906\_ALERT\_3\_C Large K Value in the Analysis of Variance ..... 5.989 Check  
PLAT911\_ALERT\_3\_C Missing FCF Refl Between Thmin & STh/L= 0.600 90 Report

|    |   |    |    |    |    |    |   |    |    |    |    |    |    |    |    |    |    |
|----|---|----|----|----|----|----|---|----|----|----|----|----|----|----|----|----|----|
| -9 | 5 | 0, | -7 | 7  | 0, | -9 | 5 | 1, | -8 | 7  | 1, | -2 | 1  | 2, | -9 | 4  | 2, |
| -9 | 5 | 2, | -8 | 7  | 2, | -7 | 8 | 2, | -6 | 9  | 2, | -5 | 10 | 2, | 8  | -6 | 3, |
| -8 | 3 | 3, | -9 | 4  | 3, | -9 | 5 | 3, | -8 | 6  | 3, | -8 | 7  | 3, | -7 | 8  | 3, |
| -6 | 9 | 3, | -4 | 10 | 3, | -9 | 4 | 4, | -9 | 5  | 4, | -8 | 6  | 4, | -7 | 7  | 4, |
| -7 | 8 | 4, | -6 | 8  | 4, | -5 | 9 | 4, | -3 | 10 | 4, | -9 | 4  | 5, | -7 | 4  | 5, |

( 60 More NOT listed: see .ckf listing file)

---

 **Alert level G**

PLAT720\_ALERT\_4\_G Number of Unusual/Non-Standard Labels ..... 7 Note  
C00C C00E C00K C00Q H00A H00B H00C

PLAT794\_ALERT\_5\_G Tentative Bond Valency for Cul (II) . 2.25 Info  
PLAT883\_ALERT\_1\_G Absent Datum for \_atom\_sites\_solution\_primary .. Please Do !  
PLAT910\_ALERT\_3\_G Missing FCF Reflection(s) Below Theta(Min)[Deg]= 2.13 Note  
0 0 1,

PLAT912\_ALERT\_4\_G Missing # of FCF Reflections Above STh/L= 0.600 127 Note  
PLAT913\_ALERT\_3\_G Missing # of Very Strong Reflections in FCF .... 1 Note  
-2 1 2,

PLAT941\_ALERT\_3\_G Average HKL Measurement Multiplicity ..... 2.6 Low  
PLAT969\_ALERT\_5\_G The 'Henn et al.' R-Factor-gap value ..... 2.066 Note  
Predicted wR2: Based on SigI\*\*2 7.34 or SHELX Weight 14.64

PLAT978\_ALERT\_2\_G Number C-C Bonds with Positive Residual Density.  
PLAT994\_ALERT\_1\_G SHELXL .ins Contains no or MERG 0 Instruction ..

3 Info  
! Note

---

0 **ALERT level A** = Most likely a serious problem - resolve or explain

2 **ALERT level B** = A potentially serious problem, consider carefully

10 **ALERT level C** = Check. Ensure it is not caused by an omission or oversight

10 **ALERT level G** = General information/check it is not something unexpected

3 ALERT type 1 CIF construction/syntax error, inconsistent or missing data

8 ALERT type 2 Indicator that the structure model may be wrong or deficient

7 ALERT type 3 Indicator that the structure quality may be low

2 ALERT type 4 Improvement, methodology, query or suggestion

2 ALERT type 5 Informative message, check

---

### Validation response form

Please find below a validation response form (VRF) that can be filled in and pasted into your CIF.

```
# start Validation Reply Form
```

```
_vrf_PLAT242_c7flccu
```

```
;
```

```
PROBLEM: Low MainResAtom Ueq as Compared to Neighbours Cul Check
```

```
Author response: The relatively poor diffraction data causes the Ueq of  
The copper (II) atom deviates from the normal value. However, this does  
not affect the identification of the overall crystal structure.
```

```
;
```

```
_vrf_PLAT430_c7flccu
```

```
;
```

```
PROBLEM: Short Inter D...A Contact O2 ..07 . 2.71 Ang.
```

```
Author response: This is a normal hydrogen bond distance. Although water-  
bound H atoms could not be localized in this crystal structure.
```

```
;
```

```
# end Validation Reply Form
```

---

It is advisable to attempt to resolve as many as possible of the alerts in all categories. Often the minor alerts point to easily fixed oversights, errors and omissions in your CIF or refinement strategy, so attention to these fine details can be worthwhile. It is up to the individual to critically assess their own results and, if necessary, seek expert advice.

---

**PLATON version of 15/01/2026; check.def file version of 02/01/2026**

---

## duplicate check

**No duplication found**

---

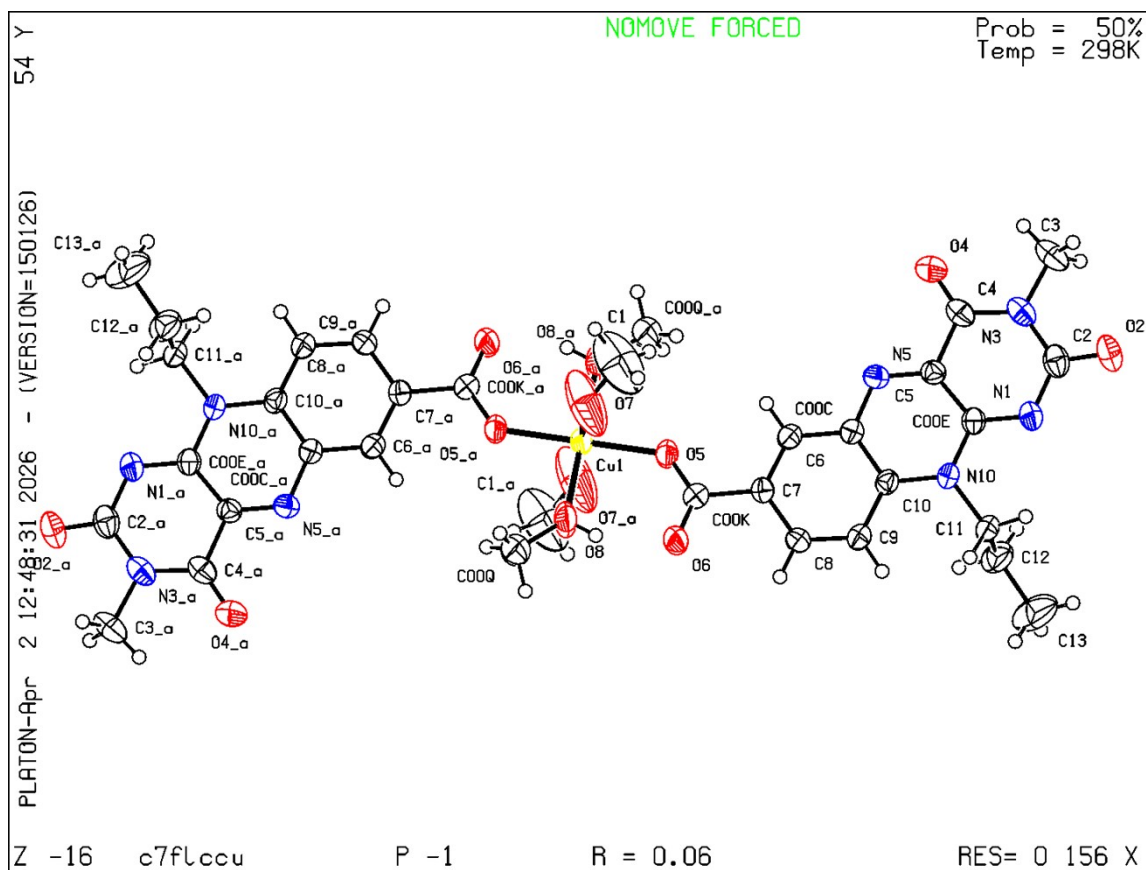

## Checkcif report of N10FlcCu

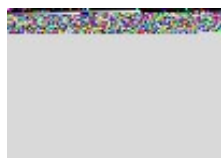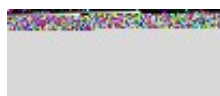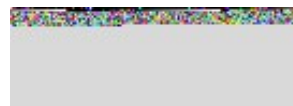

### checkCIF/PLATON report

Structure factors have been supplied for datablock(s) n10flccu

THIS REPORT IS FOR GUIDANCE ONLY. IF USED AS PART OF A REVIEW PROCEDURE FOR PUBLICATION, IT SHOULD NOT REPLACE THE EXPERTISE OF AN EXPERIENCED CRYSTALLOGRAPHIC REFEREE.

No syntax errors found.      CIF dictionary      Interpreting this report

### Datablock: n10flccu

---

|                        |                                  |                                       |               |
|------------------------|----------------------------------|---------------------------------------|---------------|
| Bond precision:        | C-C = 0.0062 Å                   | Wavelength=0.71073                    |               |
| Cell:                  | a=33.820 (4)                     | b=10.7349 (9)                         | c=8.6029 (11) |
|                        | alpha=90                         | beta=91.611 (4)                       | gamma=90      |
| Temperature:           | 298 K                            |                                       |               |
|                        | Calculated                       | Reported                              |               |
| Volume                 | 3122.1 (6)                       | 3122.1 (6)                            |               |
| Space group            | C 2/c                            | C 1 2/c 1                             |               |
| Hall group             | -C 2yc                           | -C 2yc                                |               |
| Moiety formula         | C28 H26 Cu N8 O10 [+<br>solvent] | 0.1(C28 H26 Cu N8 O10),<br>0.15[CH4O] |               |
| Sum formula            | C28 H26 Cu N8 O10 [+<br>solvent] | C2.95 H3.20 Cu0.10 N0.80<br>O1.15     |               |
| Mr                     | 698.12                           | 74.62                                 |               |
| Dx, g cm <sup>-3</sup> | 1.485                            | 1.587                                 |               |
| Z                      | 4                                | 40                                    |               |
| Mu (mm <sup>-1</sup> ) | 0.769                            | 0.778                                 |               |
| F000                   | 1436.0                           | 1544.0                                |               |
| F000'                  | 1437.93                          |                                       |               |

|            |              |              |
|------------|--------------|--------------|
| h, k, lmax | 41, 13, 10   | 41, 13, 10   |
| Nref       | 3067         | 3066         |
| Tmin, Tmax | 0.609, 0.705 | 0.687, 0.746 |
| Tmin'      | 0.597        |              |

Correction method= # Reported T Limits: Tmin=0.687 Tmax=0.746 AbsCorr = MULTI-SCAN

Data completeness= 1.000

Theta(max)= 25.999

R(reflections)= 0.0688( 2136)

wR2(reflections)=

0.1907( 3066)

S = 1.027

Npar= 215

The following ALERTS were generated. Each ALERT has the format

**test-name\_ALERT\_alert-type\_alert-level.**

Click on the hyperlinks for more details of the test.

**Alert level B**

PLAT420\_ALERT\_2\_B D-H Bond Without Acceptor 07 --H7B . Please Check

**Alert level C**

|                   |                                                 |                               |             |
|-------------------|-------------------------------------------------|-------------------------------|-------------|
| PLAT222_ALERT_3_C | NonSolvent Resd 1 H                             | Uiso(max)/Uiso(min) Range     | 4.5 Ratio   |
| PLAT241_ALERT_2_C | High MainResAtom                                | Ueq as Compared to Neighbours | 05 Check    |
| PLAT241_ALERT_2_C | High MainResAtom                                | Ueq as Compared to Neighbours | 06 Check    |
| PLAT242_ALERT_2_C | Low MainResAtom                                 | Ueq as Compared to Neighbours | Cu1 Check   |
| PLAT242_ALERT_2_C | Low MainResAtom                                 | Ueq as Compared to Neighbours | C13 Check   |
| PLAT341_ALERT_3_C | Low Bond Precision on C-C Bonds .....           |                               | 0.0062 Ang. |
| PLAT906_ALERT_3_C | Large K Value in the Analysis of Variance ..... |                               | 2.227 Check |

**Alert level G**

FORMU01\_ALERT\_2\_G There is a discrepancy between the atom counts in the  
 \_chemical\_formula\_sum and the formula from the \_atom\_site\* data.  
 Atom count from \_chemical\_formula\_sum: C2.95 H3.2 Cu.1 N0.8 O1.15  
 Atom count from the \_atom\_site data: C2.8 H2.6 Cu.1 N0.8 O1

CELLZ01\_ALERT\_1\_G Difference between formula and atom\_site contents detected.  
 CELLZ01\_ALERT\_1\_G ALERT: Large difference may be due to a  
 symmetry error - see SYMMG tests

From the CIF: \_cell\_formula\_units\_Z 40  
 From the CIF: \_chemical\_formula\_sum C2.95 H3.20 Cu0.10 N0.80 O1.15  
 TEST: Compare cell contents of formula and atom\_site data

| atom | Z*formula | cif sites | diff  |
|------|-----------|-----------|-------|
| C    | 118.00    | 112.00    | 6.00  |
| H    | 128.00    | 104.00    | 24.00 |
| Cu   | 4.00      | 4.00      | 0.00  |
| N    | 32.00     | 32.00     | 0.00  |

```

      O      46.00      40.00      6.00
PLAT007_ALERT_5_G Number of Unrefined Donor-H Atoms .....      2 Report
      H7A      H7B
PLAT041_ALERT_1_G Calc. and Reported SumFormula      Strings Differ      Please Check
      Calc: C28 H26 Cu N8 O10
      Rep.: C2.95 H3.20 Cu0.10 N0.80 O1.15
PLAT042_ALERT_1_G Calc. and Reported MoietyFormula Strings Differ      Please Check
      Calc: C28 H26 Cu N8 O10
      Rep.: 0.1(C28 H26 Cu N8 O10), 0.15[CH4O]
PLAT045_ALERT_1_G Calculated and Reported Z Differ by a Factor ...      0.100 Check
PLAT063_ALERT_4_G Crystal Size Possibly too Large for Beam Size ..      0.65 mm
PLAT083_ALERT_2_G SHELXL Second Parameter in WGHT Unusually Large      14.51 Why ?
PLAT232_ALERT_2_G Hirshfeld Test Diff (M-X) Cu1      --O7      .      6.8 s.u.
PLAT605_ALERT_4_G Largest Solvent Accessible VOID in the Structure      192 A**3
PLAT779_ALERT_4_G Suspect or Irrelevant (Bond) Angle(s) in CIF ...      0.00 Deg.
      CU1 -O6 -CU1      2_656      1_555      1_555 ..... #      30 Check
PLAT779_ALERT_4_G Suspect or Irrelevant (Bond) Angle(s) in CIF ...      0.00 Deg.
      CU1 -O5 -CU1      1_555      1_555      2_656 ..... #      51 Check
PLAT779_ALERT_4_G Suspect or Irrelevant (Bond) Angle(s) in CIF ...      0.00 Deg.
      CU1 -O7 -CU1      2_656      1_555      1_555 ..... #      81 Check
PLAT868_ALERT_4_G ALERTS Due to the Use of _smtbx_masks Suppressed      ! Info
PLAT883_ALERT_1_G Absent Datum for _atom_sites_solution_primary ..      Please Do !
PLAT910_ALERT_3_G Missing FCF Reflection(s) Below Theta (Min) [Deg]=      1.99 Note
      2 0 0,
PLAT967_ALERT_5_G Note: Two-Theta Cutoff Value in Embedded .res ..      52.0 Degree
PLAT969_ALERT_5_G The 'Henn et al.' R-Factor-gap value .....      3.700 Note
      Predicted wR2: Based on SigI**2 5.16 or SHELX Weight 18.58
PLAT978_ALERT_2_G Number C-C Bonds with Positive Residual Density.      2 Info
PLAT994_ALERT_1_G SHELXL .ins Contains no or MERG 0 Instruction ..      ! Note

```

---

0 ALERT level A = Most likely a serious problem - resolve or explain

1 ALERT level B = A potentially serious problem, consider carefully

7 ALERT level C = Check. Ensure it is not caused by an omission or oversight

21 ALERT level G = General information/check it is not something unexpected

7 ALERT type 1 CIF construction/syntax error, inconsistent or missing data  
 9 ALERT type 2 Indicator that the structure model may be wrong or deficient  
 4 ALERT type 3 Indicator that the structure quality may be low  
 6 ALERT type 4 Improvement, methodology, query or suggestion  
 3 ALERT type 5 Informative message, check

---

### Validation response form

Please find below a validation response form (VRF) that can be filled in and pasted into your CIF.

```

# start Validation Reply Form
_vrf_PLAT420_n10flccu
;

PROBLEM: D-H Bond Without Acceptor O7      --H7B      .      Please check
Author response: This alert concerns the hydrogen atoms of lattice water
molecules. It is very difficult to locate hydrogen atoms accurately using
X-ray data because these atoms have low scattering power. However, this
does not affect the identification of the overall crystal structure.
;

# end Validation Reply Form

```

It is advisable to attempt to resolve as many as possible of the alerts in all categories. Often the minor alerts point to easily fixed oversights, errors and omissions in your CIF or refinement strategy, so attention to these fine details can be worthwhile. It is up to the individual to critically assess their own results and, if necessary, seek expert advice.

## duplicate check

No duplication found

Datablock n10flccu - ellipsoid plot

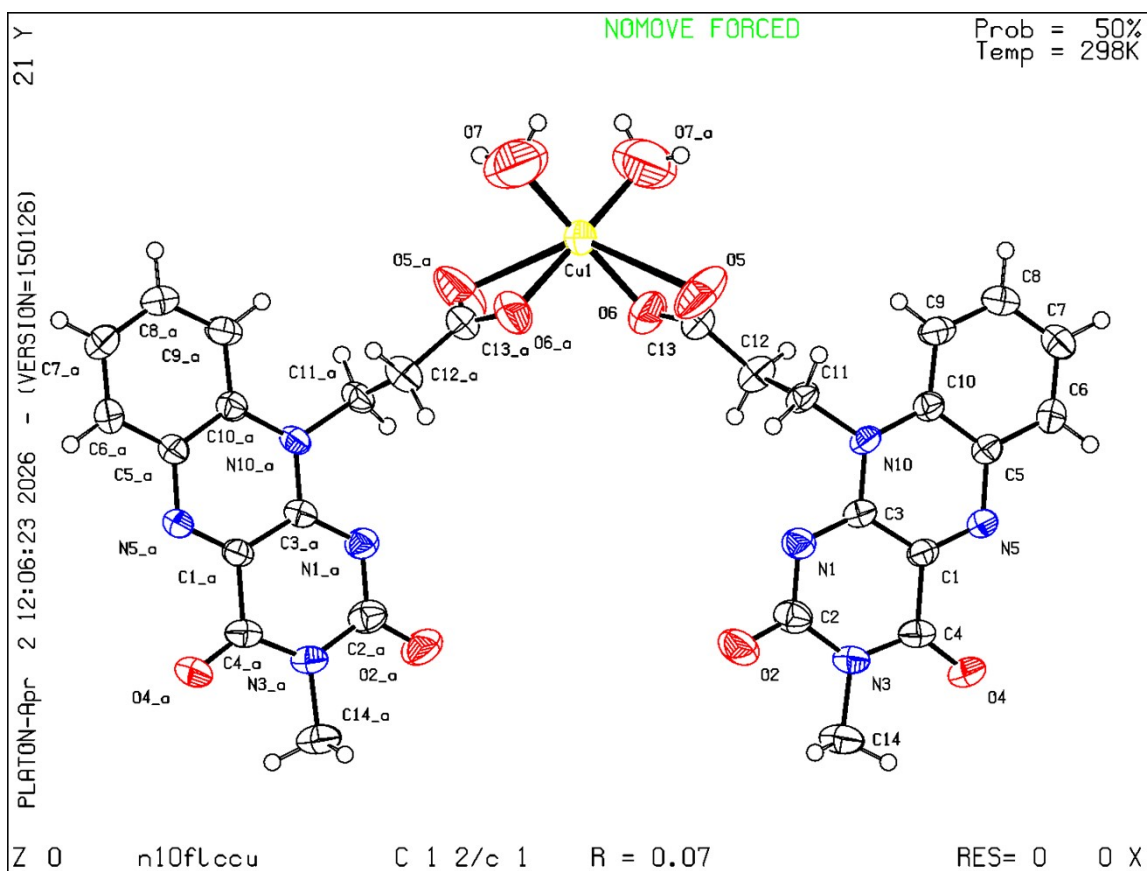

## NMR and HRMS data

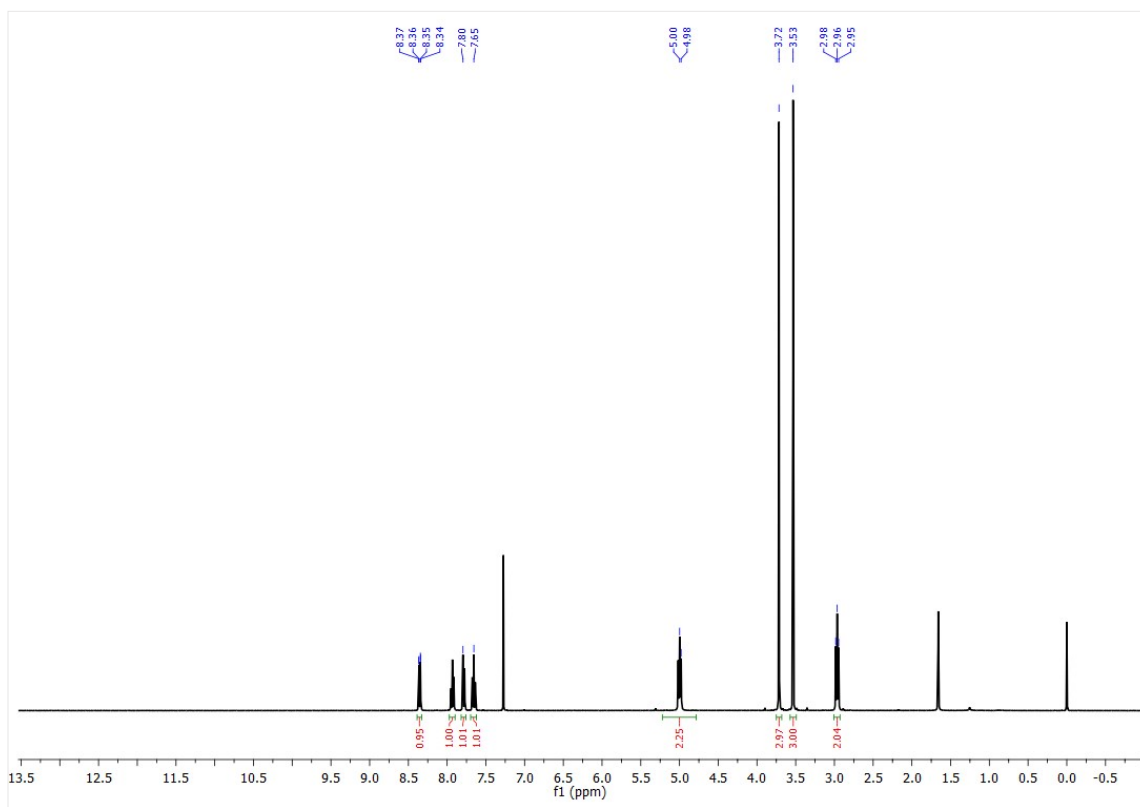

Figure S15.  $^1\text{H}$  NMR of 13 in  $\text{CDCl}_3$ .

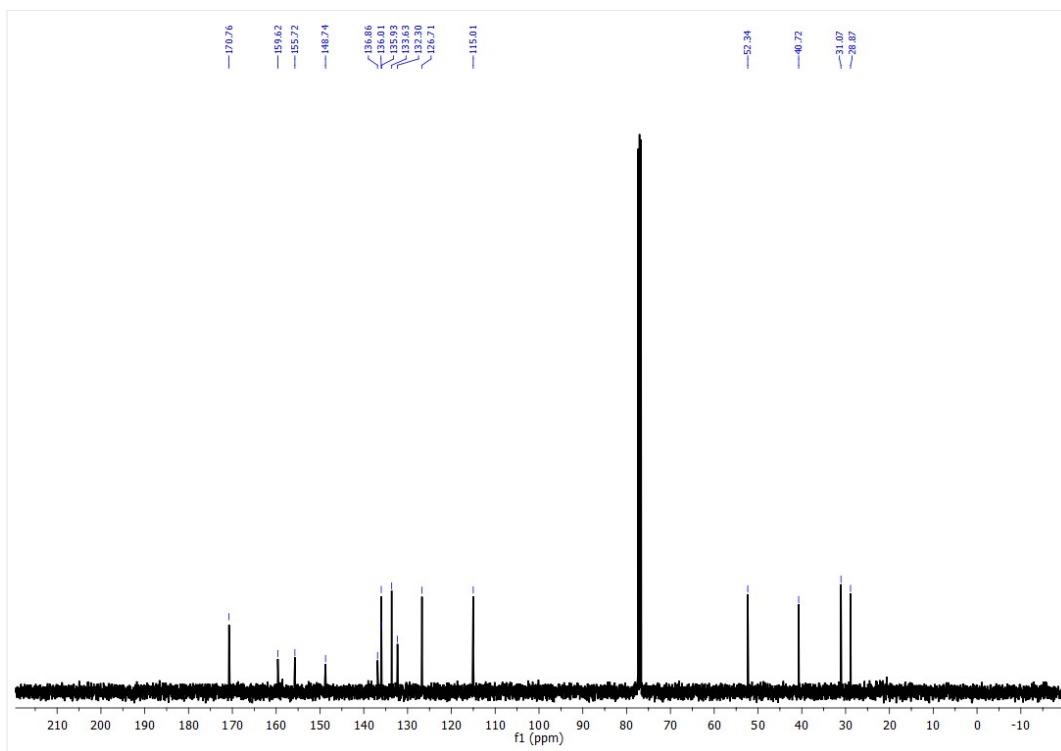

**Figure S16.**  $^{13}\text{C}$  NMR of **13** in  $\text{CDCl}_3$ .

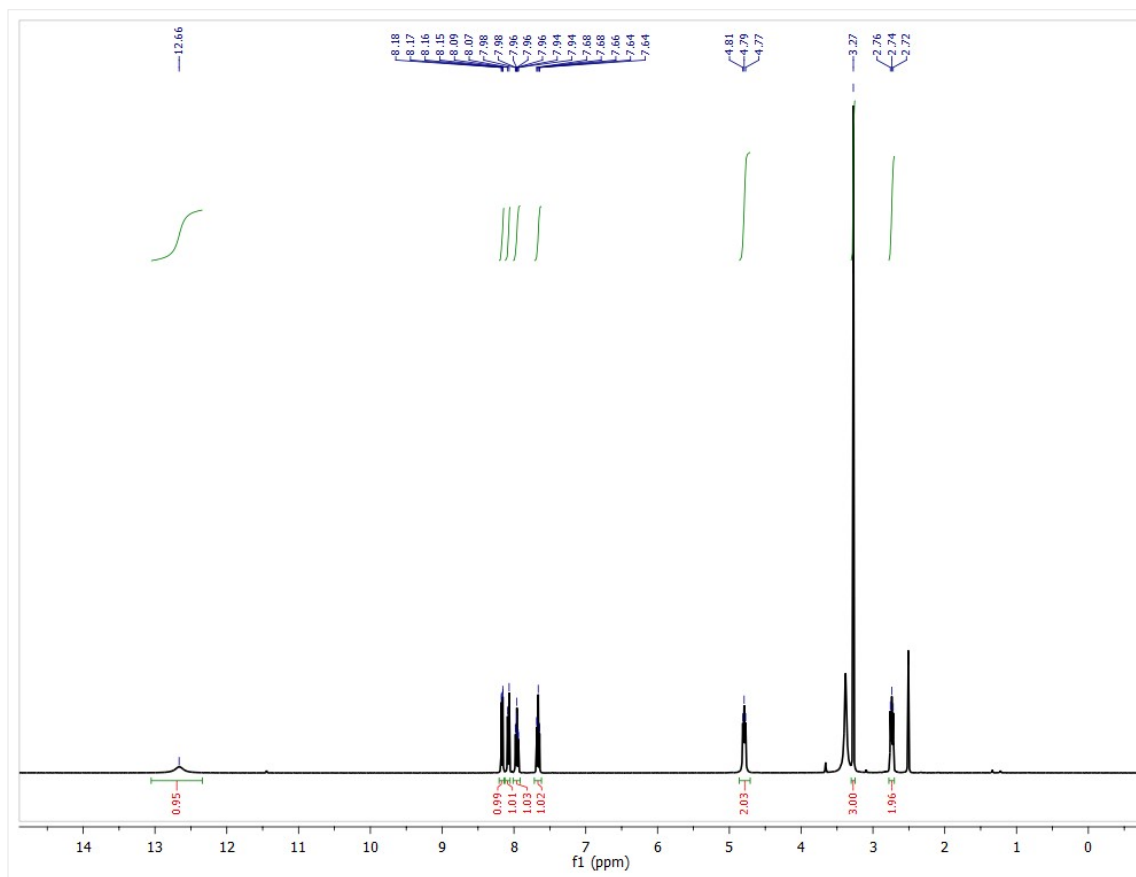

**Figure S17.**  $^1\text{H}$  NMR of N10-Flc in DMSO- $d_6$ .

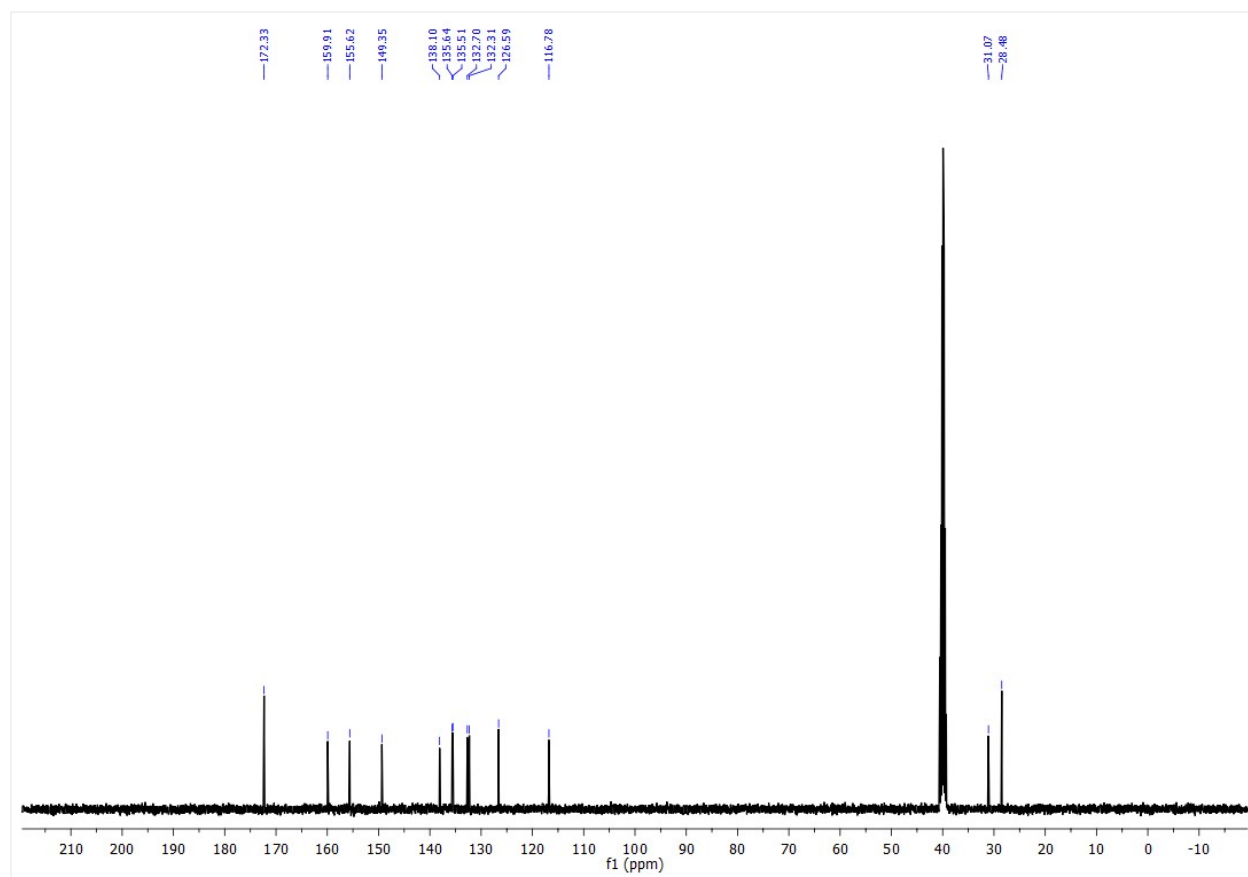

**Figure S18.**  $^{13}\text{C}$  NMR of N10-F1c in DMSO- $d_6$ .

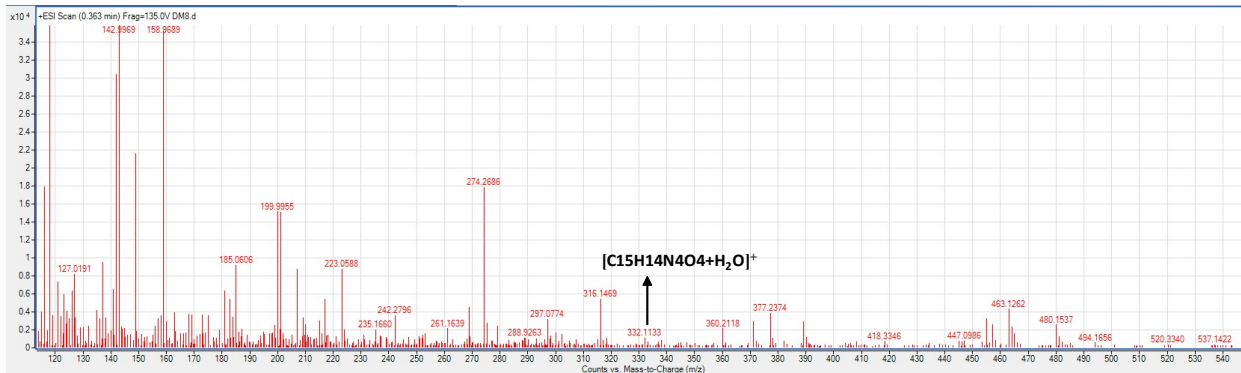

Figure S19. HRMS of 13.

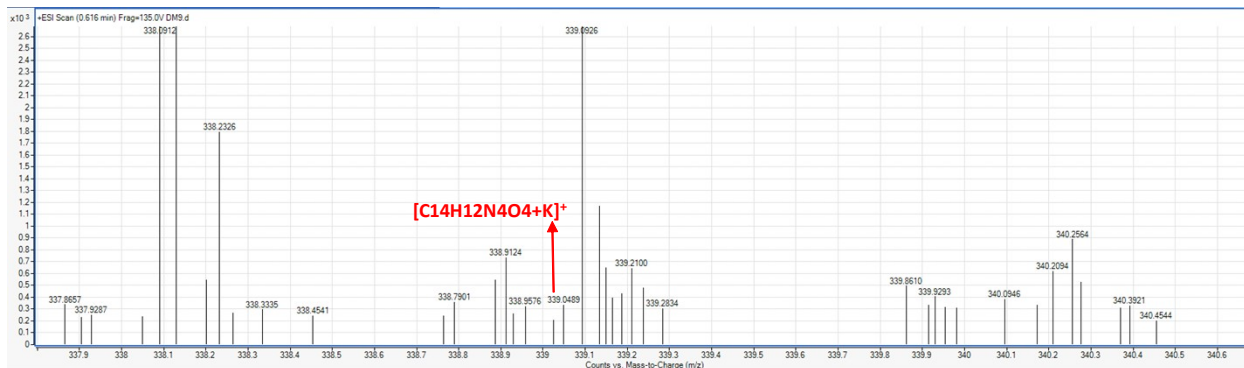

Figure S20. HRMS of N10-Flc.

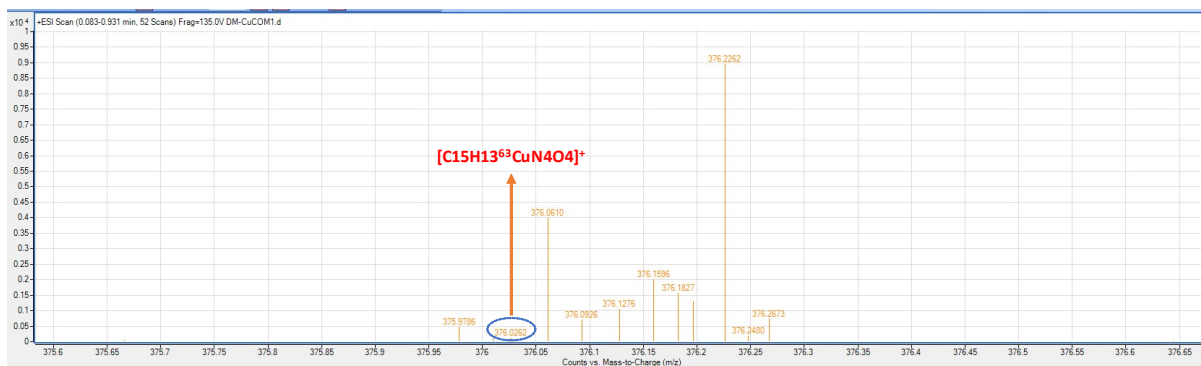

**Figure S21.** HRMS of **C7F1cCu** (Mass calculated for **C7F1cCu** ( $C_{15}H_{13}^{63}CuN_4O_4$ ) = 376.0233, and observed 376.0262).

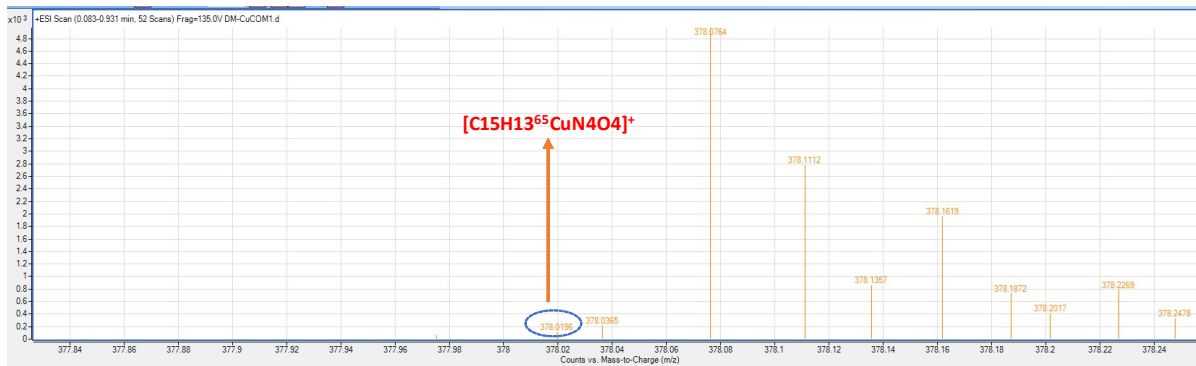

**Figure S22.** HRMS of **C7F1cCu** (Mass calculated for **C7F1cCu** ( $C_{15}H_{13}^{65}CuN_4O_4$ ) = 378.0215, and observed 378.0196).

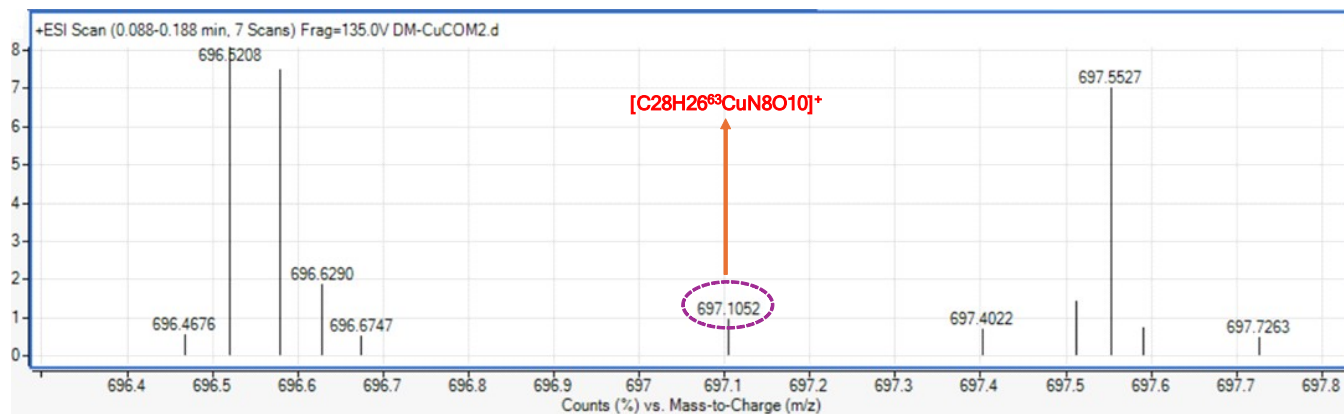

**Figure S23.** HRMS of **N10FlcCu** (Mass calculated for  $C_{28}H_{26}^{63}CuN_8O_{10}$ ) = 697.1068 and observed 697.1052).

## Reference

1. M. V. Mouli, A. K. Mishra, *Org. Biomol. Chem.* **2024**, *21*, 5622-5628.
2. M. V. Mouli, Mishra, A. K., *J. Chem. Sci.* **2022**, *134*, 59.
3. D. Mondal, I. Naskar, M. Deepa, A. K. Mishra, *Energy Adv.* **2024**, *3*, 1710-1716.
4. D. Mondal, A. K. Mishra, pH controlled unique flavin-silver complexes leading to divergent nanoparticle architecture, **2026** (manuscript under revision).
